# Supplementary material for: Cardiovascular risk in axial spondyloarthritis—a systematic review
Source: PubMed Central journal article supplement (PMC10497445; doi:10.1007/s10067-023-06655-z), 2023-07-07
Supplement: 10067_2023_6655_MOESM1_ESM.pdf [file 10067_2023_6655_MOESM1_ESM.pdf]

## APPENDIX

### Cardiovascular risk in axial spondyloarthritis – A systematic review

Rainer Hintenberger<sup>1</sup>, ORCID: 0000-0002-5142-0860, e-mail: rainer.hintenberger@kepleruniklinikum.at

Barbara Affenzeller<sup>1</sup>, ORCID: 0009-0009-0991-1189, e-mail: barbara.affenzeller@kepleruniklinikum.at

Valeriia Vladychuk<sup>2</sup>, ORCID: 0009-0002-6051-0726, e-mail: valerii.vladychuk@kepleruniklinikum.at

Herwig Pieringer<sup>3</sup>, ORCID: 0000-0003-0401-7849, e-mail: herwigpi@yahoo.com

<sup>1</sup> Department for Internal Medicine II, Kepler University Hospital GmbH, Johannes Kepler University Linz, Krankenhausstraße 9, 4020 Linz and Altenbergerstraße 69, 4040 Linz, Austria

<sup>2</sup> Department for Internal Medicine II, Kepler University Hospital GmbH, Krankenhausstraße 9, 4020 Linz

<sup>3</sup> Diakonissen Hospital Linz, Linz, Austria and Paracelsus Private Medical University Salzburg, Salzburg, Austria

Corresponding author: Rainer Hintenberger

*Research question:*

In what way are cardiovascular diseases associated with axial spondyloarthritis?

PUBMED:

**Concept 1: cardiovascular diseases**

**Keywords:**

cardiovasc\*[tw] OR cardiac[tw] OR vasc\*[tw] OR cv[tw] OR cardiovascul\*[tw] OR "coronary heart"[tw] OR ischemic[tw] OR ischaemic[tw] OR "coronary arter\*" [tw] OR "peripheral arter\*" [tw] OR cerebrovasc[tw] OR stroke[tw] OR "myocardial infarction"[tw] OR "heart attack"[tw] OR pad OR "pulse wave velocity\*" [tw] OR "pulse wave analysis"[tw] OR blood pressure[tw] OR hypertension[tw] OR lipids[tw] OR cholesterol[tw] OR triglycerid\*[tw] OR "high density lipoprotein" [tw] OR hdl[tw] OR "low density lipoprotein"[tw] OR "lipoprotein{a}" [tw] OR "remnant cholesterol"[tw] OR "dyslipidemia" OR smoking[tw] OR "augmentation index"[tw] OR "pulse wave velocity"[tw] OR "pulse wave"[tw] OR "brachial ankle index"[tw]

**MeSH:**

"Heart Disease Risk Factors"[Mesh] OR "Cardiovascular Diseases"[Mesh] OR "Myocardial Infarction"[Mesh] OR "heart failure" [Mesh] OR "heart valve diseases" [Mesh] OR "myocardial ischemia" [Mesh] OR "rheumatic heart disease" [Mesh] OR hypertension [Mesh] OR "metabolic diseases" [Mesh] OR "peripheral vascular diseases" [Mesh] OR vasculitis [Mesh] OR "hemostatic disorders" [Mesh]

**-AND-**

**Concept 2: axial Spondyloarthritis**

**Keywords:**

"ankylosing spondylitis"[tw] OR "spondylitis"[tw] OR "spondyloarthropath\*" [tw] OR "spondylarthropath\*" [tw] OR "spondylitis ankylos\*" [tw] OR axSPA[tw] OR r-axSPA[tw] OR nr-axSPA[tw] OR sacroileitis[tw] OR sacroiliitis[tw] OR spondyloarthrit\*[tw] OR spondylarthrit\*[tw]

**MeSH:** "Spondylitis, Ankylosing"[Mesh] OR "Axial Spondyloarthritis"[Mesh]

SCOPUS:

**Concept 1: cardiovascular diseases**

**Keywords:**

“ankylos\* W/2 spondyl\*” OR spondylitis OR spondyloarthropath\* OR spondylarthropath\* OR  
\*axSPA OR sacroil?itis OR spondyloarthrit\* OR spondylarthrit\*

**-AND-**

**Concept 2: axial spondyloarthritis**

**Keywords:**

cardiovasc\* OR cardiac OR vasc\* OR cv OR cardiovascul\* OR {coronary heart} OR ischemic  
OR isch?emic OR “coronary arter\*” OR “peripheral arter\*” OR cerebrovasc\* OR stroke OR  
{myocardial infarction} OR {heart attack} OR pad OR “pulse wave velocit\*” OR {pulse wave  
analysis} OR {blood pressure} OR hypertensi\* OR lipids OR cholesterol OR triglycerid\* OR  
“high?density?lipoprotein” OR hdl OR “low?density?lipoprotein” OR “lipoprotein?a\*” OR  
“remnant cholester\*” OR dyslipidemia OR smoking OR {augmentation index} OR {pulse wave  
velocity} OR {pulse wave} OR {brachial ankle index}
